# Supplementary material for: Interconversion of MeReO(dithiolate)(NC5H4-X) and MeReO(dithiolate)(PAr3) complexes: The equilibrium constants follow the Hammett equation but the rate constants do notElectronic supplementary information (ESI) available: Additional plots of kinetic data and analysis. See http://www.rsc.org/suppdata/dt/b3/b306634g/
Source: Royal Society of Chemistry journal article supplement (doi:10.1039/b306634g), 2003-01-01
Supplement: b306634g.doc [file b306634g.doc]

**Supporting Information**

Interconversion of MeReO(dithiolate)(NC5H4-X) and MeReO(dithiolate)(PAr3) Complexes: The Equilibrium Constants Follow the Hammett Equation but the Rate Constants Do Not

Xiaopeng Shan, James H. Espenson

Table of contents

**Figure S-1**. Plots of the rate constants as functions of [PZ3]: 0.025 mM **5**, 5 mM Pyridine, 10-70 mM CyPh2P or Cy2PhP in C6H6 at 25 oC

**Figure S-2**. Plots of the pseudo-first-order rate constants against the concentrations of PPh­3 for its reactions with MeReO(pdt)(NC5H­4-4-X) at 25 °C in benzene.

**Figure S-2**. Spectrophotometric titration of MeReO(pdt)(NC5H­4-4-X) with P(C6H4-Y-4)3 at 25 °C in benzene.

**Table S-1**. Rate constants of reaction between MeReO(edt)(C5H5N) and Ph3P in C6H6 at 283~323 K.

**Table S-2**. Pseudo-first-order rate constants of reaction between MeReO(dt)(4-X-C5H4N) and P(C6H4-4-Y) in C6H6 at 25 °C.

| 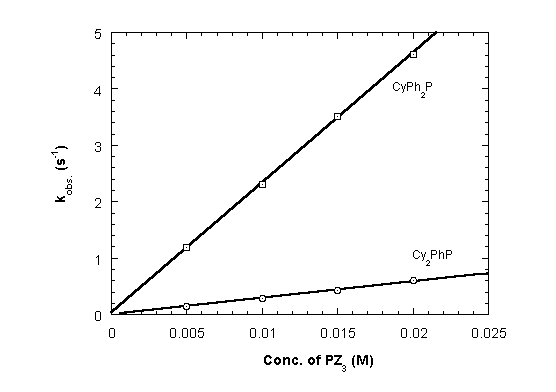 |  |
| --- | --- |

**Figure S-1**. Plots of the rate constants as functions of [PZ3]: 0.025 mM **5**, 5 mM Pyridine, 10-70 mM CyPh2P or Cy2PhP in C6H6 at 25 oC

| 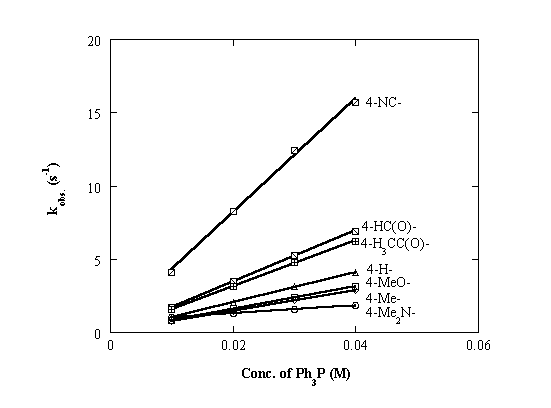 | Figure **S-2**. Plots of the pseudo-first-order rate constants against the concentrations of PPh­3 for its reactions with MeReO(pdt)(NC5H­4-4-X) at 25 °C in benzene. |
| --- | --- |

**Figure S-2**. Spectrophotometric titration of MeReO(pdt)(NC5H­4-4-X) with P(C6H4-Y-4)3 at 25 °C in benzene.

|  |  |
| --- | --- |
|  |  |
|  |  |
|  |  |
|  |  |
|  |  |

Table **S-1**. Rate constants of reaction between MeReO(edt)(C5H5N) and Ph3P in C6H6 at 283~323 K.

| T (K) | k (L mol-1 s-1) |
| --- | --- |
| 283 | 72 |
| 288 | 87 |
| 293 | 106 |
| 298 | 126 |
| 303 | 151 |
| 308 | 178 |
| 313 | 211 |
| 318 | 249 |
| 323 | 286 |

**Table S-2**. Pseudo-first-order rate constants of reaction between MeReO(dt)(4-X-C5H4N) (0.05 mM) and P(C6H4-4-Y)3 in C6H6 at 25 °C.

| dt | X | [4-X- C5H4N] /M | Y | [P(C6H4-4-Y)3] /M | kobs. /s-1 |
| --- | --- | --- | --- | --- | --- |
| edt | OMe | 0.01 | OMe | 0.005 | 1.23 |
| edt | OMe | 0.01 | OMe | 0.010 | 2.09 |
| edt | OMe | 0.01 | OMe | 0.015 | 3.36 |
| edt | OMe | 0.01 | OMe | 0.020 | 4.64 |
| edt | OMe | 0.01 | Me | 0.005 | 0.563 |
| edt | OMe | 0.01 | Me | 0.010 | 1.18 |
| edt | OMe | 0.01 | Me | 0.015 | 1.79 |
| edt | OMe | 0.01 | Me | 0.020 | 2.41 |
| edt | OMe | 0.01 | H | 0.010 | 1.037 |
| edt | OMe | 0.01 | H | 0.030 | 3.083 |
| edt | OMe | 0.01 | H | 0.050 | 4.99 |
| edt | OMe | 0.01 | H | 0.070 | 6.78 |
| edt | OMe | 0.01 | F | 0.005 | 0.784 |
| edt | OMe | 0.01 | F | 0.00865 | 1.314 |
| edt | OMe | 0.01 | F | 0.015 | 2.24 |
| edt | OMe | 0.01 | F | 0.020 | 2.92 |
| edt | OMe | 0.01 | Cl | 0.005 | 0.923 |
| edt | OMe | 0.01 | Cl | 0.010 | 1.83 |
| edt | OMe | 0.01 | Cl | 0.0088 | 1.67 |
| edt | OMe | 0.01 | Cl | 0.0118 | 2.19 |
| edt | Me | 0.01 | OMe | 0.005 | 1.237 |
| edt | Me | 0.01 | OMe | 0.010 | 1.85 |
| edt | Me | 0.01 | OMe | 0.015 | 3.04 |
| edt | Me | 0.01 | OMe | 0.020 | 4.18 |
| edt | Me | 0.01 | Me | 0.005 | 0.589 |
| edt | Me | 0.01 | Me | 0.010 | 1.082 |
| edt | Me | 0.01 | Me | 0.015 | 1.67 |
| edt | Me | 0.01 | Me | 0.020 | 2.21 |
| edt | Me | 0.01 | H | 0.010 | 0.933 |
| edt | Me | 0.01 | H | 0.030 | 2.76 |
| edt | Me | 0.01 | H | 0.050 | 4.54 |
| edt | Me | 0.01 | H | 0.070 | 6.39 |
| edt | Me | 0.01 | F | 0.005 | 0.698 |
| edt | Me | 0.01 | F | 0.00865 | 1.193 |
| edt | Me | 0.01 | F | 0.015 | 2.02 |
| edt | Me | 0.01 | F | 0.020 | 2.70 |
| edt | Me | 0.01 | Cl | 0.005 | 0.881 |
| edt | Me | 0.01 | Cl | 0.010 | 1.628 |
| edt | Me | 0.01 | Cl | 0.0088 | 1.41 |
| edt | Me | 0.01 | Cl | 0.0118 | 1.88 |
| edt | H | 0.01 | OMe | 0.005 | 1.96 |
| edt | H | 0.01 | OMe | 0.010 | 2.57 |
| edt | H | 0.01 | OMe | 0.015 | 4.26 |
| edt | H | 0.01 | OMe | 0.020 | 6.24 |
| edt | H | 0.01 | Me | 0.005 | 0.801 |
| edt | H | 0.01 | Me | 0.010 | 1.478 |
| edt | H | 0.01 | Me | 0.015 | 2.27 |
| edt | H | 0.01 | Me | 0.020 | 3.04 |
| edt | H | 0.01 | H | 0.010 | 1.282 |
| edt | H | 0.01 | H | 0.020 | 2.56 |
| edt | H | 0.01 | H | 0.030 | 3.84 |
| edt | H | 0.01 | H | 0.040 | 5.14 |
| edt | H | 0.01 | H | 0.050 | 6.39 |
| edt | H | 0.01 | H | 0.060 | 7.65 |
| edt | H | 0.01 | H | 0.070 | 8.88 |
| edt | H | 0.01 | H | 0.080 | 10.22 |
| edt | H | 0.01 | F | 0.005 | 0.875 |
| edt | H | 0.01 | F | 0.00865 | 1.521 |
| edt | H | 0.01 | F | 0.015 | 2.65 |
| edt | H | 0.01 | F | 0.020 | 3.64 |
| edt | H | 0.01 | Cl | 0.005 | 1.033 |
| edt | H | 0.01 | Cl | 0.010 | 1.88 |
| edt | H | 0.01 | Cl | 0.0088 | 1.595 |
| edt | H | 0.01 | Cl | 0.0118 | 2.12 |
| edt | HOC | 0.1 | OMe | 0.005 | 2.274 |
| edt | HOC | 0.1 | OMe | 0.010 | 4.87 |
| edt | HOC | 0.1 | OMe | 0.015 | 7.63 |
| edt | HOC | 0.1 | OMe | 0.020 | 10.98 |
| edt | HOC | 0.1 | Me | 0.005 | 1.50 |
| edt | HOC | 0.1 | Me | 0.010 | 2.94 |
| edt | HOC | 0.1 | Me | 0.015 | 4.23 |
| edt | HOC | 0.1 | Me | 0.020 | 5.64 |
| edt | HOC | 0.1 | H | 0.010 | 2.17 |
| edt | HOC | 0.1 | H | 0.030 | 6.53 |
| edt | HOC | 0.1 | H | 0.050 | 10.58 |
| edt | HOC | 0.1 | H | 0.070 | 14.3 |
| edt | HOC | 0.1 | F | 0.005 | 0.875 |
| edt | HOC | 0.1 | F | 0.00865 | 1.516 |
| edt | HOC | 0.1 | F | 0.015 | 2.46 |
| edt | HOC | 0.1 | F | 0.020 | 3.36 |
| edt | HOC | 0.1 | Cl | 0.005 | 1.022 |
| edt | HOC | 0.1 | Cl | 0.010 | 1.972 |
| edt | HOC | 0.1 | Cl | 0.0088 | 1.62 |
| edt | HOC | 0.1 | Cl | 0.0118 | 2.16 |
| edt | Ac | 0.1 | OMe | 0.005 | 2.18 |
| edt | Ac | 0.1 | OMe | 0.010 | 4.57 |
| edt | Ac | 0.1 | OMe | 0.015 | 7.05 |
| edt | Ac | 0.1 | OMe | 0.020 | 9.83 |
| edt | Ac | 0.1 | Me | 0.005 | 1.458 |
| edt | Ac | 0.1 | Me | 0.010 | 2.75 |
| edt | Ac | 0.1 | Me | 0.015 | 3.76 |
| edt | Ac | 0.1 | Me | 0.020 | 5.10 |
| edt | Ac | 0.1 | H | 0.010 | 1.95 |
| edt | Ac | 0.1 | H | 0.030 | 5.86 |
| edt | Ac | 0.1 | H | 0.050 | 9.84 |
| edt | Ac | 0.1 | H | 0.070 | 13.6 |
| edt | Ac | 0.1 | F | 0.005 | 0.875 |
| edt | Ac | 0.1 | F | 0.00865 | 1.516 |
| edt | Ac | 0.1 | F | 0.015 | 2.46 |
| edt | Ac | 0.1 | F | 0.020 | 3.36 |
| edt | Ac | 0.1 | Cl | 0.005 | 1.022 |
| edt | Ac | 0.1 | Cl | 0.010 | 1.972 |
| edt | Ac | 0.1 | Cl | 0.0088 | 1.62 |
| edt | Ac | 0.1 | Cl | 0.0118 | 2.16 |
| edt | CN | 0.1 | OMe | 0.005 | 5.02 |
| edt | CN | 0.1 | OMe | 0.010 | 10.6 |
| edt | CN | 0.1 | OMe | 0.015 | 18.0 |
| edt | CN | 0.1 | OMe | 0.020 | 24.7 |
| edt | CN | 0.1 | Me | 0.005 | 2.86 |
| edt | CN | 0.1 | Me | 0.010 | 5.70 |
| edt | CN | 0.1 | Me | 0.015 | 8.80 |
| edt | CN | 0.1 | Me | 0.020 | 12.0 |
| edt | CN | 0.1 | H | 0.010 | 4.84 |
| edt | CN | 0.1 | H | 0.030 | 15.5 |
| edt | CN | 0.1 | H | 0.050 | 24.7 |
| edt | CN | 0.1 | H | 0.070 | 32.6 |
| edt | CN | 0.1 | F | 0.005 | 1.226 |
| edt | CN | 0.1 | F | 0.00865 | 2.48 |
| edt | CN | 0.1 | F | 0.015 | 3.93 |
| edt | CN | 0.1 | F | 0.020 | 5.80 |
| edt | CN | 0.1 | Cl | 0.00295 | 0.73 |
| edt | CN | 0.1 | Cl | 0.00589 | 1.46 |
| edt | CN | 0.1 | Cl | 0.00884 | 2.21 |
| edt | CN | 0.1 | Cl | 0.0118 | 2.98 |
| edt | NMe2 | 0.01 | OMe | 0.005 | 0.490 |
| edt | NMe2 | 0.01 | OMe | 0.010 | 0.868 |
| edt | NMe2 | 0.01 | OMe | 0.015 | 1.351 |
| edt | NMe2 | 0.01 | OMe | 0.020 | 1.832 |
| edt | NMe2 | 0.01 | Me | 0.005 | 0.278 |
| edt | NMe2 | 0.01 | Me | 0.010 | 0.485 |
| edt | NMe2 | 0.01 | Me | 0.015 | 0.760 |
| edt | NMe2 | 0.01 | Me | 0.020 | 1.01 |
| edt | NMe2 | 0.01 | H | 0.010 | 0.559 |
| edt | NMe2 | 0.01 | H | 0.030 | 1.363 |
| edt | NMe2 | 0.01 | H | 0.050 | 2.14 |
| edt | NMe2 | 0.01 | H | 0.070 | 2.96 |
| edt | NMe2 | 0.01 | F | 0.005 | 1.31 |
| edt | NMe2 | 0.01 | F | 0.00865 | 1.61 |
| edt | NMe2 | 0.01 | F | 0.015 | 2.94 |
| edt | NMe2 | 0.01 | F | 0.020 | 3.40 |
|  |  |  |  |  |  |
| pdt | NMe2 | 0.01 | H | 0.010 | 1.035 |
| pdt | NMe2 | 0.01 | H | 0.020 | 1.30 |
| pdt | NMe2 | 0.01 | H | 0.030 | 1.59 |
| pdt | NMe2 | 0.01 | H | 0.040 | 1.85 |
| pdt | OMe | 0.01 | OMe | 0.005 | 0.773 |
| pdt | OMe | 0.01 | OMe | 0.010 | 1.60 |
| pdt | OMe | 0.01 | OMe | 0.015 | 2.31 |
| pdt | OMe | 0.01 | OMe | 0.020 | 3.16 |
| pdt | OMe | 0.01 | Me | 0.005 | 0.460 |
| pdt | OMe | 0.01 | Me | 0.010 | 0.917 |
| pdt | OMe | 0.01 | Me | 0.015 | 1.373 |
| pdt | OMe | 0.01 | Me | 0.020 | 1.821 |
| pdt | OMe | 0.01 | H | 0.010 | 0.840 |
| pdt | OMe | 0.01 | H | 0.020 | 1.628 |
| pdt | OMe | 0.01 | H | 0.030 | 2.406 |
| pdt | OMe | 0.01 | H | 0.040 | 3.15 |
| pdt | OMe | 0.01 | F | 0.005 | 0.972 |
| pdt | OMe | 0.01 | F | 0.00865 | 1.505 |
| pdt | OMe | 0.01 | F | 0.015 | 2.30 |
| pdt | OMe | 0.01 | F | 0.020 | 3.01 |
| pdt | OMe | 0.01 | Cl | 0.005 | 1.695 |
| pdt | OMe | 0.01 | Cl | 0.010 | 2.57 |
| pdt | OMe | 0.01 | Cl | 0.0088 | 2.23 |
| pdt | OMe | 0.01 | Cl | 0.0118 | 2.72 |
| pdt | Me | 0.01 | OMe | 0.005 | 0.680 |
| pdt | Me | 0.01 | OMe | 0.010 | 1.373 |
| pdt | Me | 0.01 | OMe | 0.015 | 2.03 |
| pdt | Me | 0.01 | OMe | 0.020 | 2.76 |
| pdt | Me | 0.01 | Me | 0.005 | 0.414 |
| pdt | Me | 0.01 | Me | 0.010 | 0.832 |
| pdt | Me | 0.01 | Me | 0.015 | 1.233 |
| pdt | Me | 0.01 | Me | 0.020 | 1.637 |
| pdt | Me | 0.01 | H | 0.010 | 0.745 |
| pdt | Me | 0.01 | H | 0.020 | 1.46 |
| pdt | Me | 0.01 | H | 0.030 | 2.17 |
| pdt | Me | 0.01 | H | 0.040 | 2.87 |
| pdt | Me | 0.01 | F | 0.005 | 0.815 |
| pdt | Me | 0.01 | F | 0.00865 | 1.283 |
| pdt | Me | 0.01 | F | 0.015 | 1.997 |
| pdt | Me | 0.01 | F | 0.020 | 2.64 |
| pdt | Me | 0.01 | Cl | 0.005 | 1.34 |
| pdt | Me | 0.01 | Cl | 0.010 | 2.15 |
| pdt | Me | 0.01 | Cl | 0.0088 | 1.85 |
| pdt | Me | 0.01 | Cl | 0.0118 | 2.30 |
| pdt | H | 0.01 | OMe | 0.005 | 0.929 |
| pdt | H | 0.01 | OMe | 0.010 | 1.91 |
| pdt | H | 0.01 | OMe | 0.015 | 2.79 |
| pdt | H | 0.01 | OMe | 0.020 | 3.86 |
| pdt | H | 0.01 | Me | 0.005 | 0.568 |
| pdt | H | 0.01 | Me | 0.010 | 1.148 |
| pdt | H | 0.01 | Me | 0.015 | 1.70 |
| pdt | H | 0.01 | Me | 0.020 | 2.28 |
| pdt | H | 0.01 | H | 0.010 | 1.049 |
| pdt | H | 0.01 | H | 0.020 | 2.09 |
| pdt | H | 0.01 | H | 0.030 | 3.13 |
| pdt | H | 0.01 | H | 0.040 | 4.10 |
| pdt | H | 0.01 | F | 0.005 | 0.931 |
| pdt | H | 0.01 | F | 0.00865 | 1.563 |
| pdt | H | 0.01 | F | 0.015 | 2.51 |
| pdt | H | 0.01 | F | 0.020 | 3.39 |
| pdt | H | 0.01 | Cl | 0.005 | 1.17 |
| pdt | H | 0.01 | Cl | 0.010 | 2.15 |
| pdt | H | 0.01 | Cl | 0.0088 | 1.80 |
| pdt | H | 0.01 | Cl | 0.0118 | 2.36 |
| pdt | HOC | 0.1 | OMe | 0.005 | 1.84 |
| pdt | HOC | 0.1 | OMe | 0.010 | 3.91 |
| pdt | HOC | 0.1 | OMe | 0.015 | 5.42 |
| pdt | HOC | 0.1 | OMe | 0.020 | 7.33 |
| pdt | HOC | 0.1 | Me | 0.005 | 1.14 |
| pdt | HOC | 0.1 | Me | 0.010 | 2.29 |
| pdt | HOC | 0.1 | Me | 0.015 | 3.57 |
| pdt | HOC | 0.1 | Me | 0.020 | 4.75 |
| pdt | HOC | 0.1 | H | 0.010 | 1.72 |
| pdt | HOC | 0.1 | H | 0.020 | 3.46 |
| pdt | HOC | 0.1 | H | 0.030 | 5.25 |
| pdt | HOC | 0.1 | H | 0.040 | 6.92 |
| pdt | HOC | 0.1 | F | 0.005 | 0.901 |
| pdt | HOC | 0.1 | F | 0.00865 | 1.55 |
| pdt | HOC | 0.1 | F | 0.015 | 2.64 |
| pdt | HOC | 0.1 | F | 0.020 | 3.50 |
| pdt | HOC | 0.1 | Cl | 0.00295 | 1.046 |
| pdt | HOC | 0.1 | Cl | 0.00589 | 1.65 |
| pdt | HOC | 0.1 | Cl | 0.0088 | 2.26 |
| pdt | HOC | 0.1 | Cl | 0.0118 | 2.87 |
| pdt | Ac | 0.1 | OMe | 0.005 | 1.82 |
| pdt | Ac | 0.1 | OMe | 0.010 | 3.70 |
| pdt | Ac | 0.1 | OMe | 0.015 | 4.97 |
| pdt | Ac | 0.1 | OMe | 0.020 | 6.73 |
| pdt | Ac | 0.1 | Me | 0.005 | 1.035 |
| pdt | Ac | 0.1 | Me | 0.010 | 2.09 |
| pdt | Ac | 0.1 | Me | 0.015 | 3.02 |
| pdt | Ac | 0.1 | Me | 0.020 | 4.01 |
| pdt | Ac | 0.1 | H | 0.010 | 1.565 |
| pdt | Ac | 0.1 | H | 0.020 | 3.16 |
| pdt | Ac | 0.1 | H | 0.030 | 4.78 |
| pdt | Ac | 0.1 | H | 0.040 | 6.24 |
| pdt | Ac | 0.1 | F | 0.005 | 0.924 |
| pdt | Ac | 0.1 | F | 0.00865 | 1.579 |
| pdt | Ac | 0.1 | F | 0.015 | 2.78 |
| pdt | Ac | 0.1 | F | 0.020 | 3.68 |
| pdt | Ac | 0.1 | Cl | 0.00295 | 1.422 |
| pdt | Ac | 0.1 | Cl | 0.00589 | 2.06 |
| pdt | Ac | 0.1 | Cl | 0.0088 | 2.69 |
| pdt | Ac | 0.1 | Cl | 0.0118 | 3.33 |
| pdt | CN | 0.1 | OMe | 0.005 | 3.35 |
| pdt | CN | 0.1 | OMe | 0.010 | 7.07 |
| pdt | CN | 0.1 | OMe | 0.015 | 11.1 |
| pdt | CN | 0.1 | OMe | 0.020 | 15.9 |
| pdt | CN | 0.1 | Me | 0.005 | 2.32 |
| pdt | CN | 0.1 | Me | 0.010 | 4.67 |
| pdt | CN | 0.1 | Me | 0.015 | 7.10 |
| pdt | CN | 0.1 | Me | 0.020 | 9.67 |
| pdt | CN | 0.1 | H | 0.010 | 4.09 |
| pdt | CN | 0.1 | H | 0.020 | 8.30 |
| pdt | CN | 0.1 | H | 0.030 | 12.4 |
| pdt | CN | 0.1 | H | 0.040 | 15.7 |
| pdt | CN | 0.1 | F | 0.005 | 1.24 |
| pdt | CN | 0.1 | F | 0.00865 | 2.18 |
| pdt | CN | 0.1 | F | 0.015 | 3.72 |
| pdt | CN | 0.1 | F | 0.020 | 5.16 |
| pdt | CN | 0.1 | Cl | 0.00295 | 0.926 |
| pdt | CN | 0.1 | Cl | 0.00589 | 1.767 |
| pdt | CN | 0.1 | Cl | 0.00884 | 2.64 |
| pdt | CN | 0.1 | Cl | 0.0118 | 3.51 |
